# Supplementary material for: ERK inhibition represses gefitinib resistance in non-small cell lung cancer cells
Source: Oncotarget. 2018 Jan 10;9(15):12020–34. doi: 10.18632/oncotarget.24147 (PMC5844726; doi:10.18632/oncotarget.24147)
Supplement: Supplementary file 1 [file oncotarget-09-12020-s001.pdf]

# ERK inhibition represses gefitinib resistance in non-small cell lung cancer cells

## SUPPLEMENTARY MATERIALS

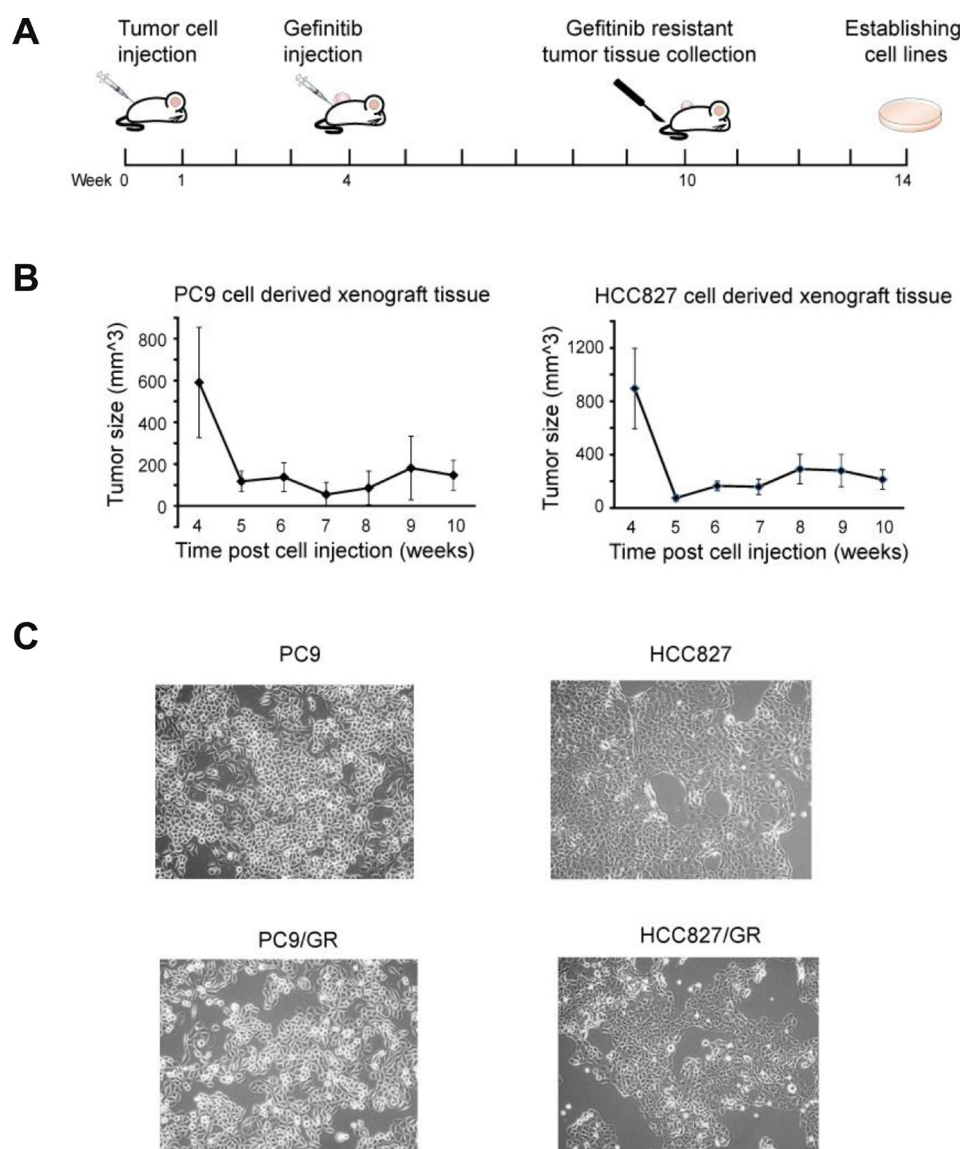

**Supplementary Figure 1: *In vivo* screening of gefitinib-resistant PC9/GR and HCC827/GR NSCLC cells.** (A) Schematic of the experimental workflow for isolating the gefitinib-resistant PC9/GR and HCC827/GR cells from the xenograft tumor tissues. (B) The tumor size was measured every week from weeks 4 to 10. (C) Microscopic images of PC9, PC9/GR, HCC827, and HCC827/GR cells.

## Xenograft tissues

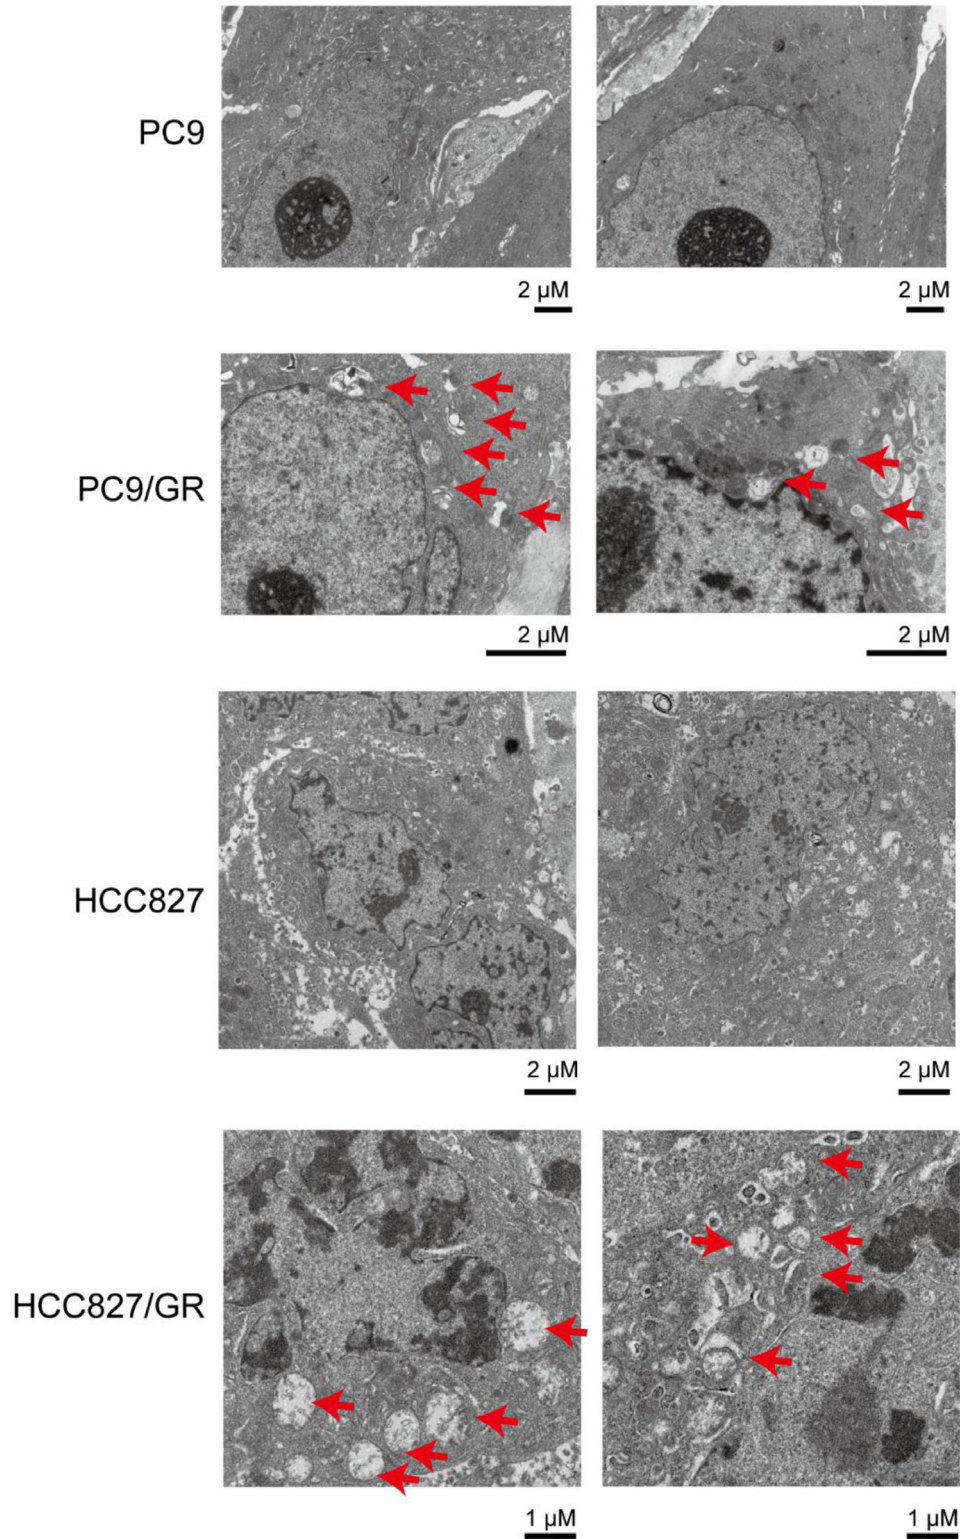

**Supplementary Figure 2: TEM images of the xenograft tissues derived from PC9, PC9/GR, HCC827, and HCC827/GR cells.** The xenograft tissues derived from the following cells: PC9, PC9/GR, HCC827, and HCC827/GR (from top to bottom) were dissected, and sent for TEM imaging analysis. The autophagic vacuoles are pointed by the red arrows in PC9/GR and HCC827/GR cells, while they are absent in PC9 and HCC827 cells.

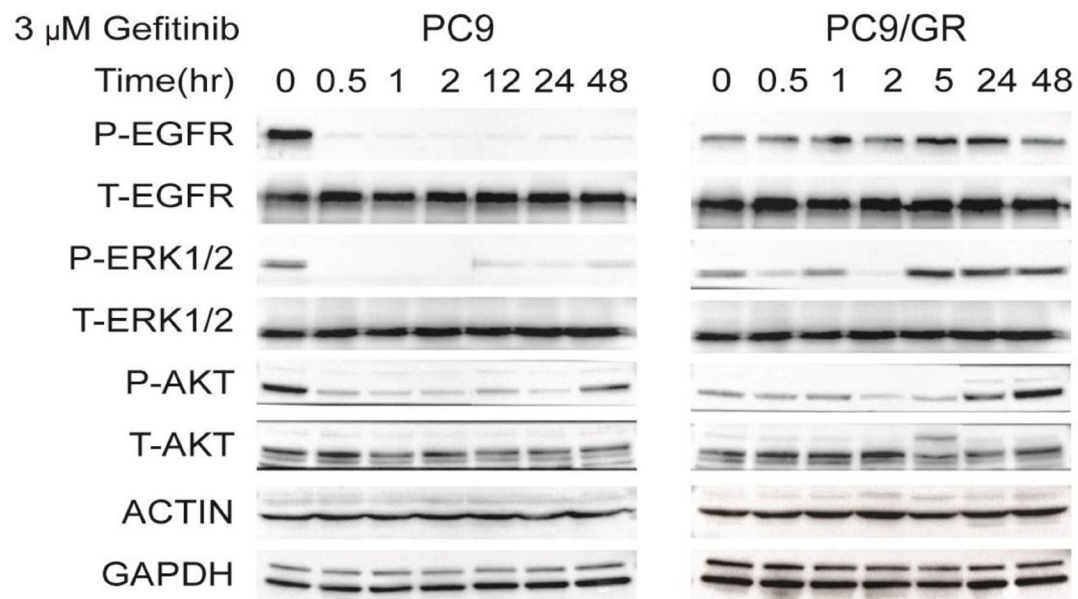

**Supplementary Figure 3: WB detection of changes in signaling pathways over time in PC9 and PC9/GR cells.** WB detection of the total (T-) and phosphorylated (P-) EGFR, ERK1/2, and AKT protein levels in PC9 cells (left) and PC9/GR cells (right) cultured in media containing 3  $\mu$ M gefitinib for various lengths of time (0, 0.5, 1, 2, 5, 12, 24, and 48 hours). Actin or GAPDH serves as the loading control.

**A**

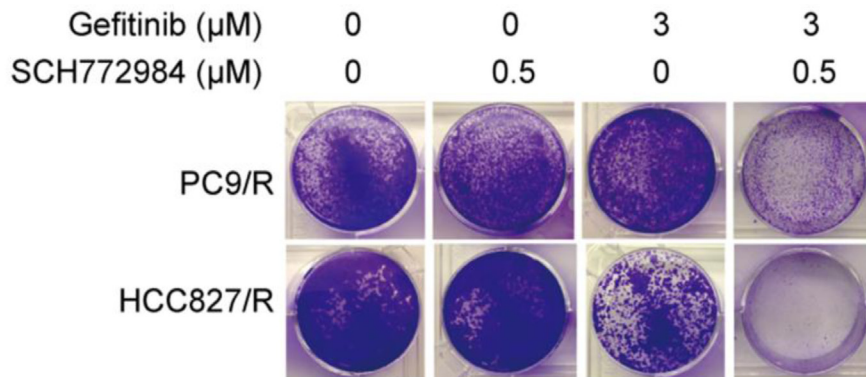

**B**

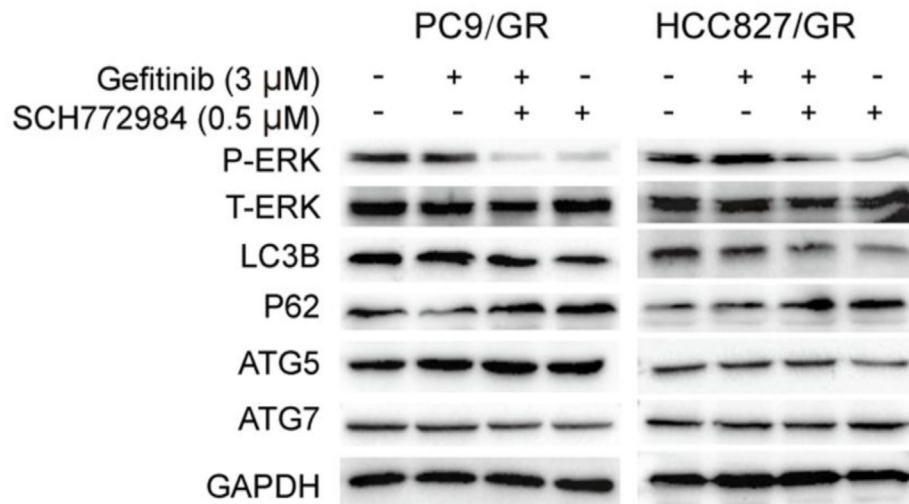

**Supplementary Figure 4: The effect of ERK1/2 inhibition by SCH772984 on gefitinib resistance and autophagy in PC9R and HCC827R cells.** (A) PC9R cells (top) and HCC827R cells (bottom) were cultured in media containing either DMSO (Control), 0.5  $\mu\text{M}$  SCH772984 (ERK1/2 inhibitor), 3  $\mu\text{M}$  gefitinib, or the combination of both SCH772984 and gefitinib, and cultured for additional 12 days followed by colony formation assays; (B) WB detection of the total and phosphorylated ERK1/2, LC3B, p62, ATG5, ATG7, Beclin 1 levels in the PC9R and HCC827R cells cultured in the four treatment conditions described above.

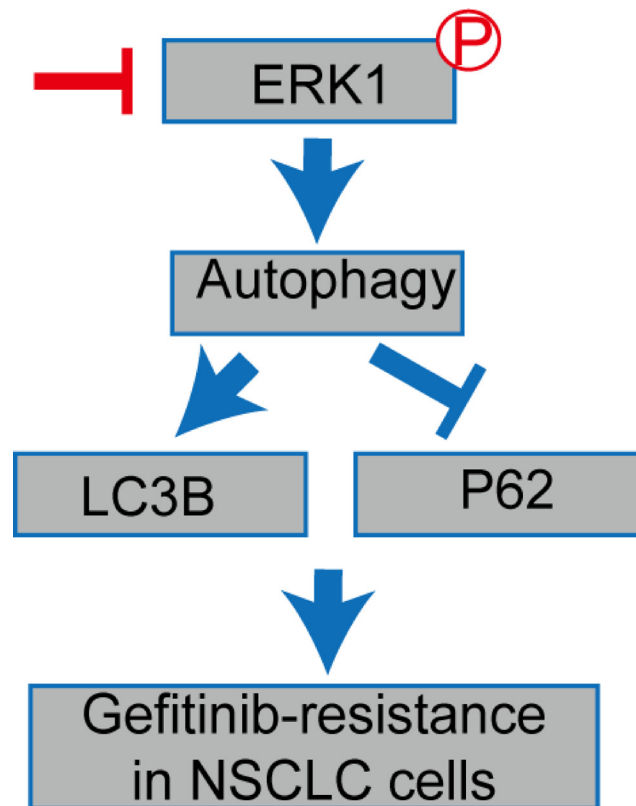

**Supplementary Figure 5: The model of ERK-mediated autophagy and gefitinib resistance.** Activated ERK1/2 enhances autophagy, in which LC3B-II is up-regulated and p62 is down-regulated. This leads to gefitinib-resistant NSCLC cells. Inhibition of the ERK signaling results in the suppression of gefitinib resistance in NSCLC cells.

**Supplementary Table 1: Antibody names and catalogue numbers**

| Antibody name                  | Catalogue number                  |
|--------------------------------|-----------------------------------|
| LC3B                           | CST #3868                         |
| GAPDH                          | Sigma G9545                       |
| Actin                          | CST #4970                         |
| ATG7                           | CST #8558                         |
| ATG5                           | CST #2630                         |
| P-EGFR (Tyr1068)               | CST #3777                         |
| EGFR                           | CST #4267                         |
| P-ERK (Thr202/Tyr204)          | CST #4370                         |
| ERK                            | Santa Cruz Biotechnology: sc-94   |
| P-AKT (Ser473)                 | CST #4060                         |
| AKT                            | Santa Cruz Biotechnology: sc-1619 |
| p62                            | CST #8025                         |
| P-Beclin 1 (Ser93)             | CST #14717                        |
| Beclin 1                       | CST #3495                         |
| Goat anti-rabbit IgG           | CST, #7074S                       |
| Goat polyclonal anti-mouse IgG | Abcam, #ab136815                  |

**Supplementary Table 2: PCR primer names and sequences**

| PCR primer name | sequence                        |
|-----------------|---------------------------------|
| CANX forward    | 5'-AACCCGAAGGCTGGTTAGAT-3'      |
| CANX reverse    | 5'-CATCCAGGAGCTGACTCACA-3'      |
| EDEM1 forward   | 5'-AAGCCTGCAATGAAGGAGAA-3'      |
| EDEM1 reverse   | 5'-CTATCAGCACCTGCAGTCCA-3'      |
| RB1CC1 forward  | 5'-GCGGAACAACAGACCAATTT-3'      |
| RB1CC1 reverse  | 5'-CGTTCCTTGTGCTGCATTGT-3'      |
| FOXO1 forward   | 5'-CTGCATCCATGGACAACAAC-3'      |
| FOXO1 reverse   | 5'-AGGCCATTTGGAAACTGTG-3'       |
| MAPK1 forward   | 5'-GTTGGTACAGGGCTCCAGAA-3'      |
| MAPK1 reverse   | 5'-TGGAAAGATGGGCCTGTTAG-3'      |
| HSPB8 forward   | 5'-GCTTCAAGCCAGAGGAGTTG-3'      |
| HSPB8 reverse   | 5'-TGCAGGAAGCTGGATTTTCT-3'      |
| CDKN1A forward  | 5'-GGAAGACCATGTGGACCTGT-3'      |
| CDKN1A reverse  | 5'-GGCGTTTGGAGTGGTAGAAA-3'      |
| ATG16L2 forward | 5'-TGACAGCTGCCAAATTCAAG-3'      |
| ATG16L2 reverse | 5'-GGACATTGATGGTCCTGGAG-3'      |
| GAPDH forward   | 5'-CCGGGAAACTGTGGCGTGATGG-3'    |
| GAPDH reverse   | 5'-AGGTGGAGGAGTGGGTGTCGCTGTT-3' |

**Supplementary Table 3: The GFOLD output files of the mRNA-Seq data (PC9/GR compared to PC9 cells).** Two biological replicates were used for mRNA-Seq experiments, which are labeled as “PC9GRvsPC9” and “PC9GRvsPC9\_rep” in the table. See Supplementary\_Table\_3

**Supplementary Table 4: The KEGG pathway enrichment analysis of top 2000 up or down-regulated genes in PC9/GR cells, as compared with those in PC9 cells.** See Supplementary\_Table\_4
